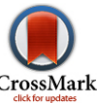

## Correction

# Correction: Modulating Drug Resistance by Targeting *BCRP/ABCG2* Using Retrovirus-Mediated RNA Interference

The *PLOS ONE* Staff

The seventh author's name is spelled incorrectly. The correct spelling is: Yi Jing.

## Reference

1. Xie N, Mou L, Yuan J, Liu W, Deng T, et al. (2014) Modulating Drug Resistance by Targeting *BCRP/ABCG2* Using Retrovirus-Mediated RNA Interference. PLoS ONE 9(7): e103463. doi:10.1371/journal.pone.0103463

**Citation:** The *PLOS ONE* Staff (2014) Correction: Modulating Drug Resistance by Targeting *BCRP/ABCG2* Using Retrovirus-Mediated RNA Interference. PLoS ONE 9(10): e111279. doi:10.1371/journal.pone.0111279

**Published:** October 10, 2014

**Copyright:** © 2014 The *PLOS ONE* Staff. This is an open-access article distributed under the terms of the Creative Commons Attribution License, which permits unrestricted use, distribution, and reproduction in any medium, provided the original author and source are credited.
